# Supplementary material for: Lacunar-canalicular network in femoral cortical bone is reduced in aged women and is predominantly due to a loss of canalicular porosity
Source: PubMed Central journal article supplement — Bone Rep. 2017 Jun 28;7:9–16. doi: 10.1016/j.bonr.2017.06.002 (PMC5517690; doi:10.1016/j.bonr.2017.06.002), 2017-06-28

**Table S1: Age distribution of Femoral Cortical Bone Samples**

| Young Samples | Age | Aged Samples | Age |
|---------------|-----|--------------|-----|
| VIFM_022      | 22  | VIFM_094     | 86  |
| VIFM_117      | 23  | VIFM_178     | 72  |
| VIFM_126      | 21  | VIFM_399     | 70  |
| VIFM_189      | 20  | VIFM_411     | 78  |
| VIFM_406      | 20  | VIFM_426     | 81  |
|               |     | VIFM_436     | 74  |

**Table S2: Influence of Different Thresholding Conditions on LCN and Canalicular Values**

|                       | LCN Area %         |                        |                        | Canalicular Area % |                                | Canalicular Area % |
|-----------------------|--------------------|------------------------|------------------------|--------------------|--------------------------------|--------------------|
|                       | Ideal Thresholding | LCN Area % Less Bright | LCN Area % More Bright | Ideal Thresholding | Canalicular Area % Less Bright | More Bright        |
| <b>Young</b>          | 17.6 ± 2.9         | 14.0 ± 2.5             | 22.9 ± 3.0             | 14.3 ± 1.9         | 11.1 ± 1.7                     | 19.2 ± 2.0         |
| <b>Aged</b>           | 10.5 ± 2.4         | 8.0 ± 2.3              | 14.9 ± 2.4             | 7.9 ± 2.0          | 5.7 ± 1.9                      | 12.0 ± 2.0         |
| <b>% Change w/age</b> | -40.6              | -43.0                  | -35.1                  | -44.6              | -48.4                          | -37.6              |
| <b>p=</b>             | 0.001              | 0.002                  | 0.0007                 | 0.001              | 0.002                          | 0.0005             |

**Figure S1. Regional characteristics of lacunar[HYPHEN]canalicular porosity across the femoral cortex.** Intra-cortical regional differences in (A) lacunar area percentage, (B) canalicular area percentage and (C) lacunar density. Error bars represent SD.

**A**

**(Lacunae Area % Changes by Cortical Segment)**

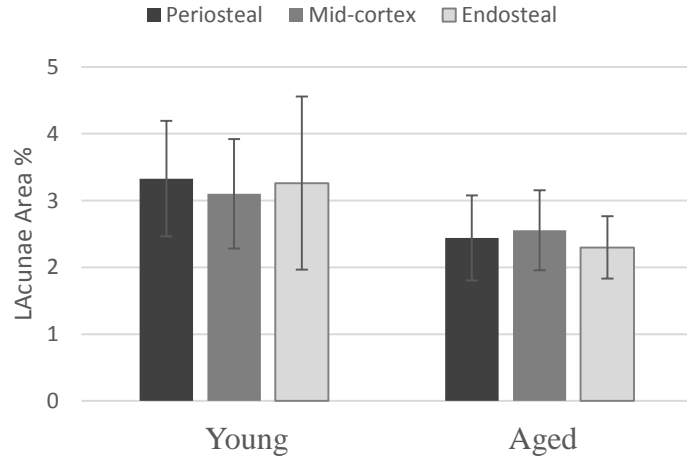

**B**

**(Canaliculi Area % Changes by Cortical Segment)**

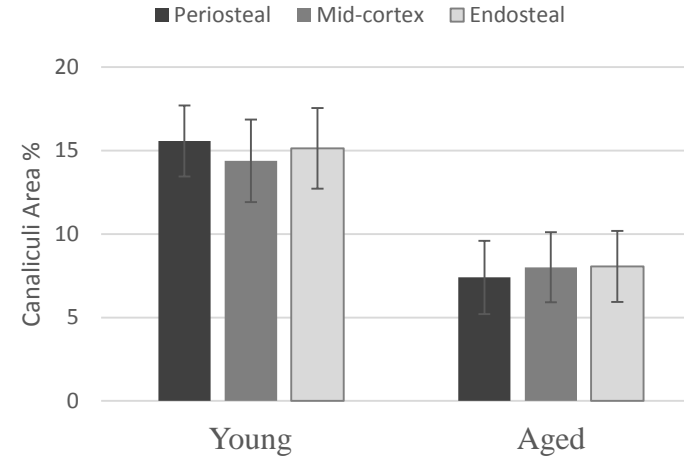

**C**

**(Lacunae#/mm<sup>2</sup> Changes by Cortical Segment)**

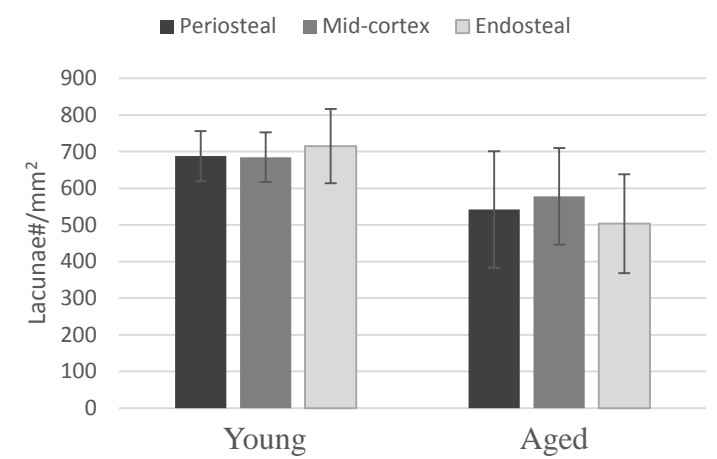

Supplement: mmc1.pdf [file mmc1.pdf]
